# Supplementary material for: Inner filter effect-based red-shift and fluorescence dual-sensor platforms with sulfur quantum dots for detection and bioimaging of alkaline phosphatase
Source: Royal Society of Chemistry journal article supplement (doi:10.1039/d2ay01658c), 2022-11-22
Supplement: d2ay01658c1.pdf [file d2ay01658c1.pdf]

# Supplementary Information for

## **Inner filter effect-based red-shift and fluorescence dual- sensor platforms with sulfur quantum dots for detection and bioimaging of alkaline phosphatase**

Keke Ning, Yao Fu, Jianghong Wu, Yujie Sun, Ke Liu, Kang Ye, Jiaxin Liu, Yuan Wu,

Jiangong Liang\*.

College of Science, State Key Laboratory of Agricultural Microbiology, Huazhong

Agricultural University, Wuhan, 430070, P.R. China

\* E-mail: [liangjg@mail.hzau.edu.cn](mailto:liangjg@mail.hzau.edu.cn)

## **1. Additional information on materials**

### *1.1. Chemicals and apparatus*

A Talos F200X transmission electron microscope was used to capture transmission electron microscopy (TEM) images of SQDs. The patterned X-ray diffraction (XRD) of SQDs was obtained on an X-ray diffractometer (D8 ADVANCE). Fourier transform infrared (FTIR) spectra using KBr pellets were collected on a Nicolet iS50 FT-IR spectrometer (Thermo Fisher, USA). The fluorescence lifetime of the SQDs was measured with a FLS1000/FS5 fluorescence spectrophotometer (Edinburgh Instruments, England). A fluorescence spectrophotometer (Shimadzu, Japan, F-6000) was used to record emission spectra. The UV-Vis spectra of SQDs were characterized using a UV-1800 scanning spectrophotometer (Shimadzu, Japan). A confocal laser scanning microscope (Olympus Fluoviewer. 1000, Japan) was used to obtain the fluorescence images.

Sublimed sulfur powder, p-Nitrophenyl phosphate disodium salt hexahydrate (p-NPP), p-Nitrophenol (p-NP), alkaline phosphatase (ALP), albumin from bovine serum (BSA) and glucose oxidase (Gox) were obtained from Aladdin (Shanghai, China); trypsin from Macklin Biochemical Co., Ltd. (Shanghai, China); sodium hydroxide, peroxidase (HRP), hydrochloric acid, hydrogen peroxide, and polyethylene glycol 400 (PEG-400) of analytical grade from Sinopharm Chemical Reagent (Shanghai, China); Histidine (His), Arginine (Arg), Glycine (Gly), Lysine (Lys), Proline (Pro), Cystine (Cys), Serine (Ser) and Methionine (Met) were obtained from Regal (Guangzhou, China); Dulbecco's Modified Eagle's medium (DMEM/High glucose) from HyClone (Utah, USA); fetal bovine serum

(FBS) from Gibco (New York, USA). Tris-HCl buffer solutions were used to control the acidity of testing solutions. All the chemical reagents were analytically pure and used without further purification. Ultrapure water ( $18 \text{ M}\Omega \text{ cm}^{-1}$ ) was used throughout the experiments.

### *1.2. Synthesis of SQDs*

SQDs were synthesized through a slightly modified  $\text{H}_2\text{O}_2$  assisted top-down method.<sup>1</sup> Briefly, sublimed sulfur powder (1.40 g), PEG-400 (3.0 mL), and sodium hydroxide (4.00 g) were dissolved in ultrapure water (50.0 mL), followed by transferring the mixture into a 250 mL three-necked round bottom flask and stirring at  $70 \text{ }^\circ\text{C}$  for 72 h. After reaction, the solution was cooled naturally to room temperature, followed by adding  $\text{H}_2\text{O}_2$  (6.75%) below  $40 \text{ }^\circ\text{C}$  and storage in a refrigerator overnight. After removing the insoluble substance by centrifugation at 10000 rpm for 10 min, the pale-yellow supernatant was obtained, followed by further dialysis for 6 h with a 500-Da MWCO dialysis membrane and storing the purified SQDs aqueous solution at  $4 \text{ }^\circ\text{C}$  for future analysis.

### *1.3. Cell culture and cytotoxicity assay of SQDs*

MCF-7 cells (breast cancer cells) were cultured in DMEM with 10% FBS and 1% antibiotics at  $37 \text{ }^\circ\text{C}$  in a humidified  $\text{CO}_2$  incubator. MCF-7 cells were seeded into 96-well plates and cultured until 80-90% confluence, followed by incubation for 24 h with SQDs in the concentration range of (0, 0.25, 0.50, 0.75, 1.0, 1.25, 1.5, and  $2.0 \text{ mg mL}^{-1}$ ), and evaluating the cell viability by the standard (methyl thiazolyl tetrazolium) MTT assay.<sup>2</sup>

### *1.4. Detection of ALP activity*

SQDs solution (200  $\mu\text{L}$ ) was placed into a 1.5 mL scale tube containing Tris-HCl buffer solution (20 mM, pH 10.5) and different concentrations of ALP, followed by adding to the tube a certain amount of standard solution of p-NPP (500  $\mu\text{M}$ ) (or sample solution), diluting the mixture with ultrapure water to 1.0 mL, shaking the solution thoroughly and incubation for 20 min at 37  $^{\circ}\text{C}$ . Finally, the fluorescence of each solution was recorded under the excitation of 355 nm. Meanwhile, a control sample was prepared without adding p-NPP standard solution or sample solution.

### *1.5. Monitor*

MCF-7 cells were seeded into confocal dishes at the density of  $1 \times 10^5$  cells per dish and cultured for 24 h, followed by removing the culture medium from dishes and three washes with cold PBS. Next, the dishes were separated into 5 groups: a control with the culture medium and the remaining 4 groups for incubation with SQDs ( $1.0 \text{ mg mL}^{-1}$ ) for 2 h, followed by using cold PBS to wash off the extracellular SQDs and adding different concentrations of p-NPP (0, 1.0, 1.5 and 2.5 mM) to each of the SQDs-treated dishes for 2 h. After three washes with cold PBS, all the dishes were fixed by 4% paraformaldehyde at room temperature for 30 min, followed by using a confocal laser scanning microscope (CLSM) to obtain the fluorescence images at the excitation wavelength of 345 nm.

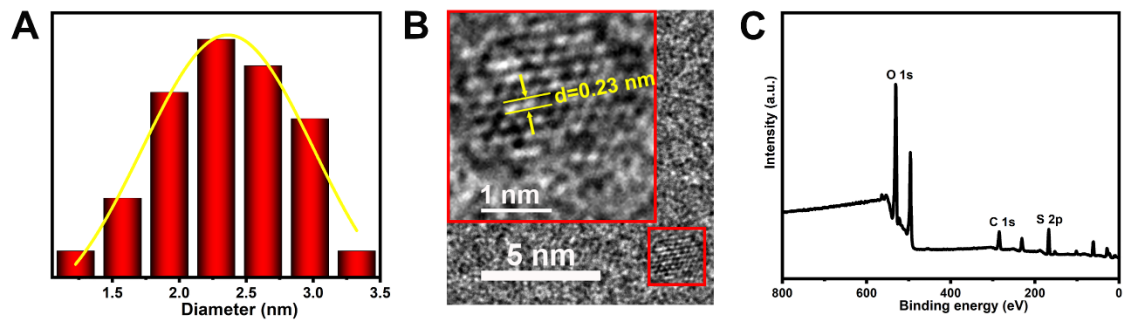

**Figure. S1.** (A) Size distribution, (B) HRTEM image, and (C) XPS spectra of SQDs.

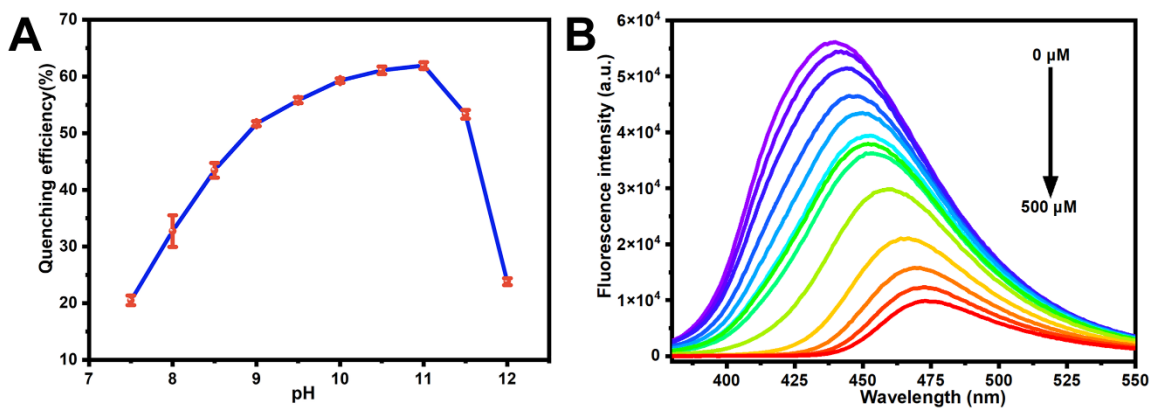

**Figure. S2.** (A) Quenching efficiency of SQDs supplemented with p-NPP and ALP at different pH values and (B) fluorescence spectra of SQDs supplemented with different concentrations of p-NP.

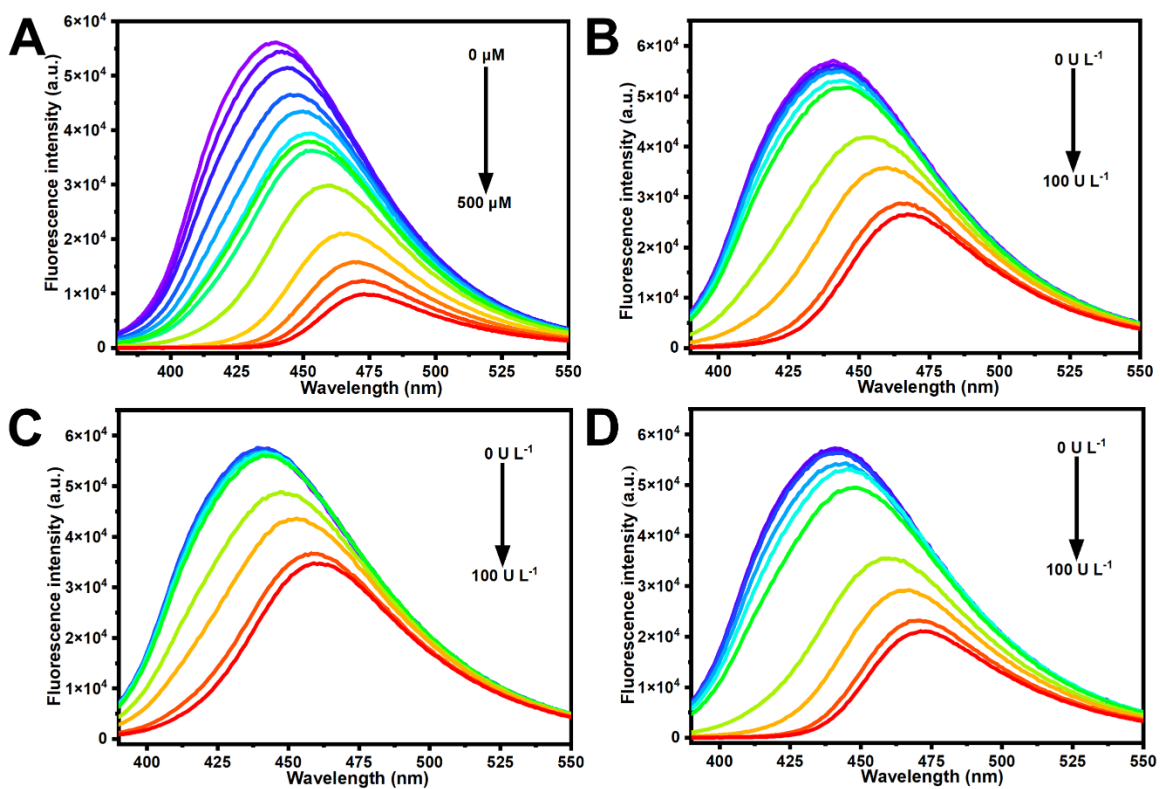

**Figure. S3.** Fluorescence spectra of SQDs supplemented with p-NPP in the concentration range of 0.25-100 U L<sup>-1</sup> ALP in (A) Na<sub>2</sub>HPO<sub>4</sub>- C<sub>6</sub>H<sub>5</sub>Na<sub>3</sub>O<sub>7</sub> buffer, (B) (Britton-Robinson) BR buffer, (C) phosphate buffer, and (D) H<sub>3</sub>BO<sub>3</sub> buffer.

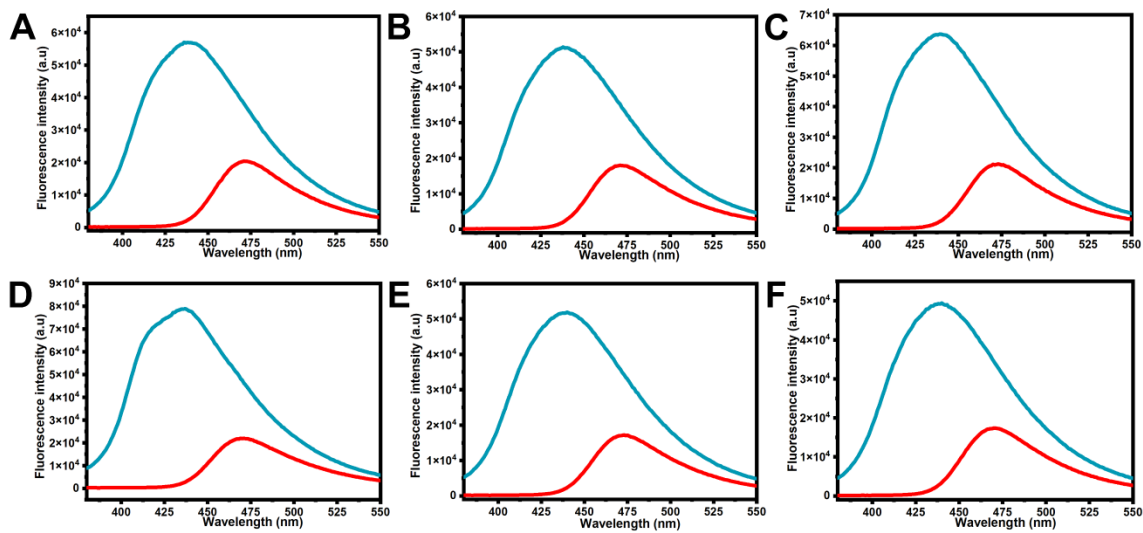

**Figure. S4.** Fluorescence spectra of SQDs with p-NP (500  $\mu$ M) in (A) DMF, (B)  $\text{CH}_3\text{OCH}_3$ , (C) DMSO, (D) THF, (E)  $\text{CH}_3\text{CH}_2\text{OH}$ , and (F)  $\text{CH}_3\text{CN}$  solvents.



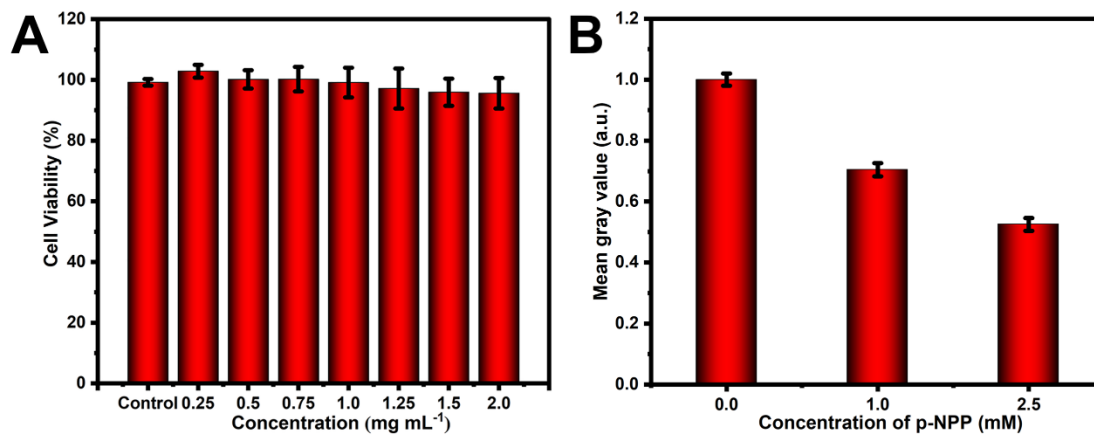

**Figure. S5.** (A) Cell viability of MCF-7 cells after incubation with different concentrations of SQDs for 24 h, and (B) the fluorescence intensity of real-time monitored cells measured by ImageJ.

**Table S1.** Comparison of different analytical methods for ALP detection

| Probes                         | LOD (U L <sup>-1</sup> ) | Linear range (U L <sup>-1</sup> ) | Ref       |
|--------------------------------|--------------------------|-----------------------------------|-----------|
| CdTe/CdS QDs                   | 0.34                     | 2.2-220                           | 3         |
| Gold nanoclusters              | 0.78                     | 0.8-16                            | 4         |
| Carbon dots                    | 0.001                    | 0.01-25                           | 5         |
| MoS <sub>2</sub> QDs and AuNCs | 0.08                     | 0.5-50                            | 6         |
| APN                            | 0.16                     | 0-100                             | 7         |
| OPD(S)-AuNPs                   | 0.3                      | 1-20                              | 8         |
| β-CD-Mn doped ZnS QDs          | 0.15                     | 0.5-10                            | 9         |
| Polydopamine Nanoparticles     | 0.34                     | 1-80                              | 10        |
| SQDs (RSEW)                    | 0.08                     | 0.25-100                          | This work |
| SQDs (fluorescence quenching)  | 0.10                     | 0.25-100                          | This work |

**Table S2.** Determination of ALP in 0.2% bovine serum samples by the RSEW method (n

= 3, mean  $\pm$  SD, U L<sup>-1</sup>)

| ALP added (U L <sup>-1</sup> ) | Measured (U L <sup>-1</sup> ) | Recovery (%) |
|--------------------------------|-------------------------------|--------------|
| 0.50                           | 0.49 $\pm$ 0.056              | 98.0         |
| 10.00                          | 9.39 $\pm$ 0.031              | 93.9         |

**Table S3.** Determination of ALP in 0.2% bovine serum samples by fluorescence intensity

(n = 3, mean  $\pm$  SD, U L<sup>-1</sup>)

| ALP added (U L <sup>-1</sup> ) | Measured (U L <sup>-1</sup> ) | Recovery (%) |
|--------------------------------|-------------------------------|--------------|
| 0.50                           | 0.54 $\pm$ 0.059              | 108.0        |
| 10.00                          | 10.23 $\pm$ 0.013             | 102.3        |

## Reference

- 1 H. G. Wang, Z. G. Wang, Y. Xiong, S. V. Kershaw, T. Z. Li, Y. Wang, Y. Q. Zhai and A. L. Rogach, *Angew. Chem. Int. Ed.*, 2019, **58**, 7040-7044.
- 2 T. Tong, S. F. Deng, X. T. Zhang, L. R. Fang, J. G. Liang and S. B. Xiao, *J Nanobiotechnol.*, 2022, **20**, 70.
- 3 G. B. Mao, Q. Zhang, Y. L. Yang, X. H. Ji and Z. K. He, *Anal. Chim. Acta*, 2019, **1047**, 208-213.
- 4 H. H. Deng, Q. Deng, K. L. Li, Q. Q. Zhuang, Y. B. Zhuang, H. P. Peng, X. H. Xia and W. Chen, *Spectrochim. Acta Part A*, 2020, **229**, 117875.
- 5 G. L. Li, H. L. Fu, X. J. Chen, P. W. Gong, G. Chen, L. Xia, H. Wang, J. M. You and Y. N. Wu, *Anal. Chem.*, 2016, **88**, 2720-2726.
- 6 Y. B. Liu, Y. Zhang, W. Zhang, X. H. Wang, Y. Sun, Y. B. Huang, P. Y. Ma, J. Ding and D. Q. Song, *Spectrochim. Acta Part A*, 2021, **262**, 120087.
- 7 Y. L. Sheng, Z. N. Huang, Q. Zhong, H. H. Deng, M. C. Lai, Y. Yang, W. Chen, X. H. Xia and H. P. Peng, *Nanoscale*, 2021, **13**, 2519-2526.
- 8 W. Wang, Y. Zhang, W. Zhang, Y. B. Liu, P. Y. Ma, X. H. Wang, Y. Sun and D. Q. Song, *Anal. Chim. Acta*, 2021, **1183**, 338989.
- 9 S. Liu, H. G. Wang, A. R. Feng, J. Y. Chang, C. C. Zhang, Y. E. Shi, Y. Q. Zhai, V. Biju and Z. G. Wang, *Nanoscale Advances*, 2021, **3**, 4271-4275.
- 10 T. Xiao, J. Sun, J. H. Zhao, S. Wang, G. Y. Liu and X. R. Yang, *ACS Appl. Mater. Interfaces*, 2018, **10**, 6560-6569.
